# The *Vibrio cholerae* Cytolysin Promotes Chloride Secretion from Intact Human Intestinal Mucosa

Lucantonio Debellis<sup>1,9</sup>, Anna Diana<sup>1,9</sup>, Diletta Arcidiacono<sup>2</sup>, Romina Fiorotto<sup>3</sup>, Piero Portincasa<sup>4</sup>, Donato Francesco Altomare<sup>5</sup>, Carlo Spirli<sup>3</sup>, Marina de Bernard<sup>2,6\*</sup>

**1** Department of General and Environmental Physiology, University of Bari, Bari, Italy, **2** Venetian Institute of Molecular Medicine, Padua, Italy, **3** Department of Internal Medicine, Section of Digestive Diseases, Yale University, New Haven, Connecticut, United States of America, **4** Clinica Medica "A. Murri", Department of Internal and Public Medicine, University Medical School, Bari, Italy, **5** Department of Emergency and Organ Transplantation, General Surgery and Liver Transplantation Units, University of Bari, Policlinico, Bari, Italy, **6** Department of Biology, University of Padua, Padua, Italy

## Abstract

**Background:** The pathogenicity of the *Vibrio cholerae* strains belonging to serogroup O1 and O139 is due to the production of virulence factors such as cholera toxin (CT) and the toxin-coregulated pilus (TCP). The remaining serogroups, which mostly lack CT and TCP, are more frequently isolated from aquatic environmental sources than from clinical samples; nevertheless, these strains have been reported to cause human disease, such as sporadic outbreaks of watery diarrhoea and inflammatory enterocolitis. This evidence suggested the possibility that other virulence factor(s) than cholera toxin might be crucial in the pathogenesis of *Vibrio cholerae*-induced diarrhoea, but their nature remains unknown. VCC, the hemolysin produced by virtually all *Vibrio cholerae* strains, has been proposed as a possible candidate, though a clear-cut demonstration attesting VCC as crucial in the pathogenesis of *Vibrio cholerae*-induced diarrhoea is still lacking.

**Methodology/Principal Findings:** Electrophysiological parameters and paracellular permeability of stripped human healthy colon tissues, obtained at subtotal colectomy, mounted in Ussing chamber were studied in the presence or absence of VCC purified from culture supernatants of *V. cholerae* O1 El Tor strain. Short circuit current ( $I_{SC}$ ) and transepithelial resistance ( $R_T$ ) were measured by a computerized voltage clamp system. The exposure of sigmoid colon specimens to 1 nM VCC resulted in an increase of  $I_{SC}$  by 20.7%, with respect to the basal values, while  $R_T$  was reduced by 12.3%. Moreover, increase in  $I_{SC}$  was abolished by bilateral  $Cl^-$  reduction.

**Conclusion/Significance:** Our results demonstrate that VCC, by forming anion channels on the apical membrane of enterocytes, triggers an outward transcellular flux of chloride. Such an ion movement, associated with the outward movement of  $Na^+$  and water, might be responsible for the diarrhoea caused by the non-toxicogenic strains of *Vibrio cholerae*.

**Citation:** Debellis L, Diana A, Arcidiacono D, Fiorotto R, Portincasa P, et al. (2009) The *Vibrio cholerae* Cytolysin Promotes Chloride Secretion from Intact Human Intestinal Mucosa. PLoS ONE 4(3): e5074. doi:10.1371/journal.pone.0005074

**Editor:** Stefan Bereswill, Charité-Universitätsmedizin Berlin, Germany

**Received:** November 20, 2008; **Accepted:** March 5, 2009; **Published:** March 31, 2009

**Copyright:** © 2009 Debellis et al. This is an open-access article distributed under the terms of the Creative Commons Attribution License, which permits unrestricted use, distribution, and reproduction in any medium, provided the original author and source are credited.

**Funding:** This work was supported by the following grants: Italian Ministry of University and Research, Prin projects (grant 2006064313), Progetti di Ricerca di Ateneo (grant CPDA074121/07) and Fondazione Guido Berlucchi to M.d.B.; University of Bari grant 2007 to L.D. C.S. is a recipient of an ALF/AASLD liver scholar award. The funders had no role in study design, data collection and analysis, decision to publish, or preparation of the manuscript.

**Competing Interests:** The authors have declared that no competing interests exist.

\* E-mail: marina.debernard@unipd.it

**9** These authors contributed equally to this work.

## Introduction

Cholera is an acute diarrhoeal infection caused mostly by ingestion of *Vibrio cholerae* O1 and O139 and it represents one of the most outbreak-prone diseases that continue to strike fear in the population wherever it occurs. Although the advent of oral rehydration therapy (ORT) has substantially improved the cholera case fatality rates, it is believed that as much as 120000 deaths may be attributed to cholera every year [1].

The pathogenicity of the *Vibrio cholerae* strains belonging to serogroup O1 and O139 is due to the production of virulence factors such as cholera toxin (CT) and the toxin-coregulated pilus (TCP); CT is essential for full-blown cholera whereas TCP is crucial for the adherence of bacteria to the intestinal epithelium [2,3]. The remaining serogroups, referred to as non-O1 and non-O139, which mostly lack CT and TCP, are more frequently

isolated from aquatic environmental sources than from clinical samples; nevertheless, these strains have been reported to evoke fluid accumulation in the ligated rabbit ileal loop assay [4–6] and to cause human disease, such as sporadic outbreaks of watery diarrhoea and inflammatory enterocolitis, despite the absence of CT. Nontoxicogenic O1 strains have also been isolated from cases of diarrhoea [7–9]. All these evidence suggested the possibility that other virulence factor(s) than CT might be crucial in the pathogenesis of *Vibrio cholerae*-induced diarrhoea, but their nature remains still unknown.

El Tor hemolysin (ETH), also known as *V. cholerae* cytolysin (VCC) consists of two major toxin groups, namely *V. cholerae* O1 (VCC1) and *V. cholerae* non-O1 (VCC2) and is produced by all strains. It is a water soluble toxin secreted as a 79 kDa inactive pro-hemolysin by *V. cholerae* [10,11]. A proteolytic cleavage by

different proteases, that remove a N-terminal segment [12], generates the mature toxin of 63 kDa. In cholesterol-and ceramides-rich membranes VCC forms heptameric channels [13,14] with a moderate anion preference, responsible for vacuolization and eventual lysis of several cell types in culture [15–18]. Recently, the vacuolization associated to VCC intoxication has been demonstrated to be an autophagic response of the cells against the toxin [19]. VCC has been proposed as virulence factor causing diarrhoea [6,20], although the ability of non-haemolytic strains of *V. cholerae* to cause fluid accumulation, suggests that it is not the sole etiologic factor involved [21].

On the basis of its channel property and considering that the majority of the diarrheagenic toxins affect chloride secretion in the intestine [22], we have investigated whether VCC was able to promote an efflux of chloride from intestinal epithelial cells either by using an intestinal cell line or by administrating the toxin on a human intestinal mucosal sheet.

Here we demonstrate for the first time that VCC is capable of inducing a chloride efflux from whole human intact intestinal epithelium and in virtue of such an activity we suggest that VCC might be the major diarrheagenic factor for the non producing cholera toxin strains, or contribute to cause diarrhoea when the toxin is present.

## Materials and Methods

### Reagents

*Vibrio cholerae* cytotoxin (VCC) was purified from culture supernatants of *V. cholerae* O1 El Tor 8731 [23]. The cleaved and active form of VCC was obtained by ethanol precipitation (final concentration, 40%), preparative isoelectric focusing in a sucrose density gradient, and hydroxyapatite chromatography [13,24]. Figure 1 shows the purity of the VCC used for the experiments. Cell culture media and FBS were from Invitrogen/Gibco. MEQ was from Molecular Probes. Krebs buffer, Staphylococcus aureus  $\alpha$ -Hemolysin, 4,4'-diisothiocyanatostilbene-2,2'-disulphonic acid (disodium salt) (DIDS), protamine, amiloride, papain, L-cysteine, FITC and Na-Isethionate were from Sigma. Caco-2 cells were from Istituto Zooprofilattico Sperimentale (Brescia, Italy).

### Caco-2 cells culture

Caco-2 cells, obtained from human colon adenocarcinoma, were grown in DMEM supplemented with 10% FBS. For chloride measurements cells were harvested the day before and seeded on 24 mm-glass coverslips ( $4 \times 10^5$  cells).

### Intracellular Cl<sup>-</sup> measurements

Changes of intracellular Cl<sup>-</sup> concentration were measured with the chloride indicator, 6-methoxy-N-ethylquinolinium iodide (MEQ) [25]. MEQ fluorescence is quenched by collision with halide ions, thus an increase in the fluorescent signal represents a decrease in the intracellular Cl<sup>-</sup> concentration. Caco-2 cells, seeded on coverslips, were loaded with 50  $\mu$ M diH-MEQ in solution #1 (NaCl 135 mM, KCl 4.7 mM, KH<sub>2</sub>PO<sub>4</sub> 1.2 mM, MgSO<sub>4</sub>·7H<sub>2</sub>O 1 mM, CaCl<sub>2</sub> 1.2 mM, HEPES 10 mM, glucose 5 mM, pyruvic acid-sodium salt 1 mM, pH 7.4) for 50 min before washing and visualizing on an Olympus inverted microscope. The incubation with VCC or PBS (as control) was carried out during the last 30 min of the dye loading. Cells were maintained in continuous perfusion with the chloride-containing buffer (solution #1): after 340 sec, solution 1 was substituted with a Cl<sup>-</sup> free buffer (solution # 2) containing NaNO<sub>3</sub> 140 mM, KNO<sub>3</sub> 5 mM, gluconic acid 3 mM, MgSO<sub>4</sub>·7H<sub>2</sub>O 1 mM, glucose 5 mM,

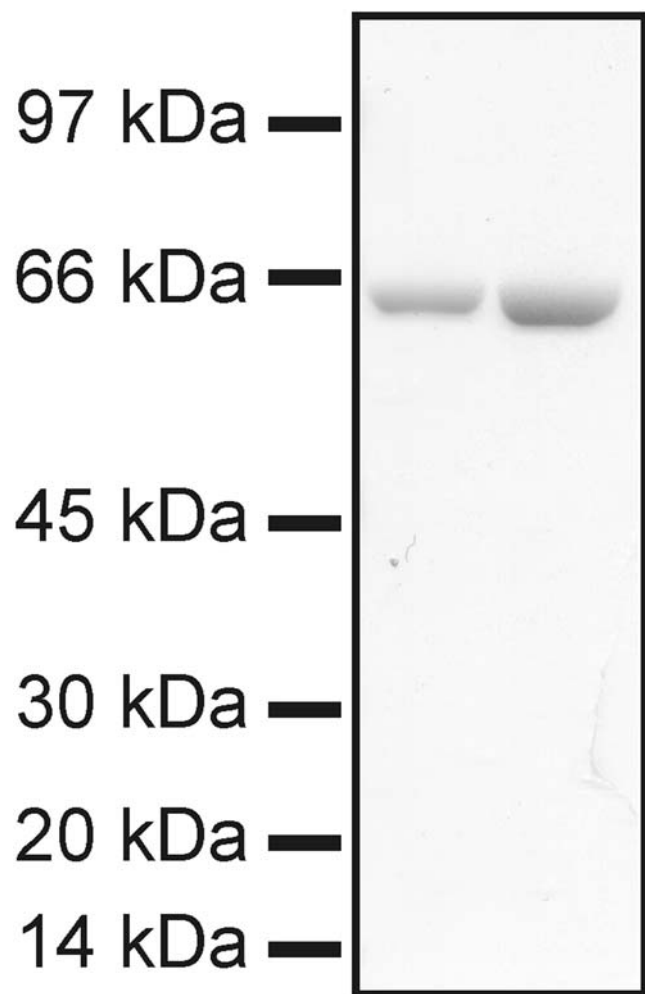

**Figure 1. SDS-PAGE of VCC preparation.** 0.5 and 1  $\mu$ g (left and right lane respectively) of VCC, purified as described in *Materials and Methods*, were applied to SDS-PAGE and stained with Coomassie-blue. doi:10.1371/journal.pone.0005074.g001

HEPES 20 mM, pH 7.4. After 500 sec, cells were re-exposed to solution 1 for 500 sec. For each experiment, fluorescence (excitation at 360 nm; emission at 420 nm) from microscopic fields, containing an average of 2–3 cells, was recorded (1 recording every 10 sec) and quantified.

To quantify changes in cellular fluorescence, the total quenchable signal of the dye was determined in each experiment, and expressed as the difference between the fluorescence signal when the cells were perfused with chloride-free buffer and the signal obtained after maximum quenching by perfusion with 150 mM potassium thiocyanate (KSCN). In the histogram representation the change in fluorescence from baseline ( $\Delta F$ ) was calculated by the equation  $\Delta F = (1 - F/F_b) \times 100$ , where  $F_b$  is the basal fluorescence at time = 0 sec. Using this method, each experiment was able to serve as its own control [26].

### Experiments on human colon

Sigmoid colon tissues were obtained from patients undergoing subtotal colectomy for colon cancer. Before surgery, all patients had given their fully informed and written consent about the aims of the surgical intervention. Upon removal of the tissue and before

inclusion in buffered formaline for routine pathology examination, a strip (about 5×1.5 cm) of full thickness colonic wall was isolated within the redundant healthy area surrounding the tumor and kept for electrophysiological studies. During dissection and experiments tissues were continuously bathed with Krebs bicarbonate/phosphate buffer, containing in mM: 107 NaCl, 4.5 KCl, 25 NaHCO<sub>3</sub>, 0.2 NaH<sub>2</sub>PO<sub>4</sub>, 1.8 Na<sub>2</sub>HPO<sub>4</sub>, 1.25 CaCl<sub>2</sub>, 1 MgCl<sub>2</sub>, and 12 D-glucose, continually gassed with O<sub>2</sub>/CO<sub>2</sub> (95%/5%) to yield pH 7.2, and warmed up to 37°C. After removal of serosal and circular muscle layers, the stripped mucosae were mounted vertically as flat sheet between the two halves of Ussing chambers (Mussler Scientific Instruments, Aachen, Germany), having an exposed area of 1 cm<sup>2</sup>. Each half-chamber had a circular fluid canal of 3.0 ml total volume filled with Krebs solution that was constantly recirculated by means of gas bubble lift. Two pairs of Ag/AgCl electrodes were used to monitor either the transepithelial potential difference (V<sub>T</sub>, mV) and the tissue resistance (R<sub>T</sub>, Ω cm<sup>2</sup>) under open-circuit condition, or the short circuit current (I<sub>SC</sub>, μA/cm<sup>2</sup>) with the transepithelial potential clamped to zero at fixed intervals of 5 min. Offset of voltage electrodes pairs and fluid resistance were evaluated prior to the onset of each experiment and systematically subtracted. At fixed intervals of 1 min a transepithelial bipolar current pulse (I) of 1 μA amplitude and 200 msec duration was applied to the tissue and the R<sub>T</sub> was automatically calculated from the change in open-circuit voltage (ΔV<sub>T</sub>) according to Ohm's law (R<sub>T</sub> = ΔV<sub>T</sub>/I).

Experiments were conducted simultaneously on one to three specimen from the same tissue. Electrical parameters were measured in the computer-controlled chambers (software Clamp v. 2.14, Aachen, Germany) in the basal state (i.e. an equilibration time of 30 to 40 min), during incubation with VCC, α-Hemolysin or drugs added to the mucosal side and after removing the agonists. In some experiments Na-Isethionate was used to completely replace the NaCl when Cl<sup>-</sup> was reduced from 116 to 9 mM in the luminal and mucosal bath. In order to avoid Ag/AgCl electrode offset change during Cl<sup>-</sup> substitution, the tissues were incubated in low-Cl<sup>-</sup> solution from the beginning of the experiment.

To enhance VCC interaction with mucosal colon surface, the layer of mucus was removed by incubation in a mucolytic solution containing papain (5 U/100 ml) plus L-cysteine (5 mM) [27,28], for 25 min. The luminal mucolytic containing solution was then substituted with Krebs solution 5 min prior the addition of the toxin. The enzyme concentration and the exposure time were kept low to avoid damage to colon mucosa. In order to prevent cysteine formation and precipitation, the mixture was freshly prepared prior each experiment.

VCC, α-Hemolysin and drugs were added directly to the mucosal bath, while solution replacing after the mucolytic treatment or drug addition was obtained within about 40 sec by continuous gravity perfusion from a reservoir and suction of the mucosal bath excess by a vacuum pump.

### Paracellular permeability evaluation in intact intestinal epithelia

The mucosal-to-serosal flux of fluorescein isothiocyanate (FITC; MW: 376.3) in human colon specimen mounted in Ussing chamber was assessed as described by Mayol and colleagues [29]. Tissue were incubated in Krebs buffer and exposed to mucolytic solution as described above. After mucolytic cocktail removal, FITC was added in the mucosal bath (140 μM final concentration), with or without VCC (1 nM) or protamine (100 mg/l). Serosal buffer aliquots were collected at 0, 5, 15, 30 and 60 min after FITC addition and replaced with identical PBS amount. The fluorescent emission at 520 nm after excitation at 480 nm was measured twice for each aliquot with a fluorescence spectrophotometer equipped with microplate reader (Cary Eclipse, Varian Inc. Palo Alto, CA, USA). A calibration curve obtained with fluorescence intensity (expressed as arbitrary units of the optical density measured at 480 nm) *vs* FITC concentration was generated to calculate the FITC concentration in the serosal chamber. The apparent permeability coefficient (P<sub>app</sub>) was calculated using the equation P<sub>app</sub> (cm/sec) = ΔC<sub>s</sub> × C<sub>m</sub><sup>-1</sup> × V × A<sup>-1</sup> × T<sup>-1</sup>, where ΔC<sub>s</sub> is the increase in FITC concentration in the serosal chamber during the interval T (sec), C<sub>m</sub> is the FITC concentration in the mucosal chamber, V is the volume (ml) of either the mucosal or serosal compartment and A is the exposed

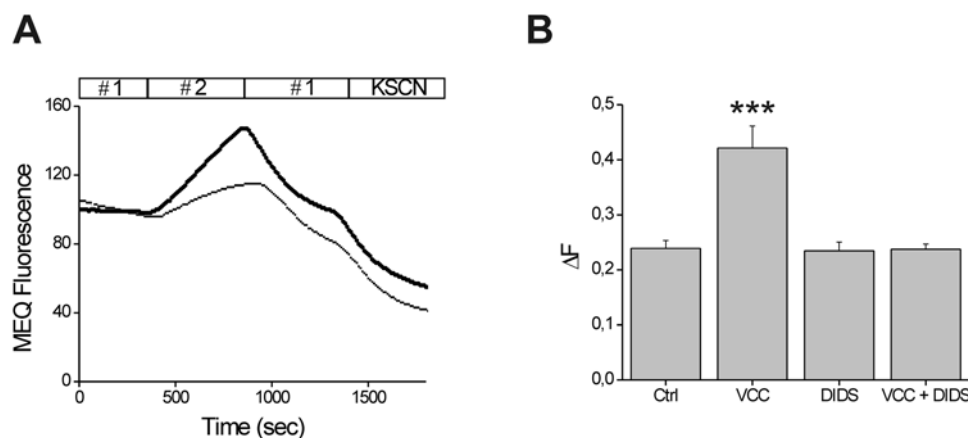

**Figure 2. Chloride efflux induced by VCC in Caco-2 cells.** A) Caco-2 cells, loaded with MEQ were incubated with (thick line) or without (thin line) 500 pM VCC. Fluorescence was estimated upon sequential buffer substitution with Cl<sup>-</sup>-containing medium (#1) followed by Cl<sup>-</sup>-free medium (#2). Substitution of solution (#1) by solution (#2) led to an increase of MEQ fluorescence (dequenching). Subsequent substitution by solution #1 induced an influx of Cl<sup>-</sup> ions, thus quenching MEQ fluorescence. Values are normalized with respect to the base line. B) Effect of 100 μM DIDS on VCC-induced chloride efflux. ΔF has been calculated as reported in the *Material and Methods* section. Each histogram represents an average of thirteen independent experiments with a recording of 2–3 cells in each assay. Significance, determined by Student's *t* test, was compared to non-treated cells (Ctrl); \*\*\*, *p* < 0.001. doi:10.1371/journal.pone.0005074.g002

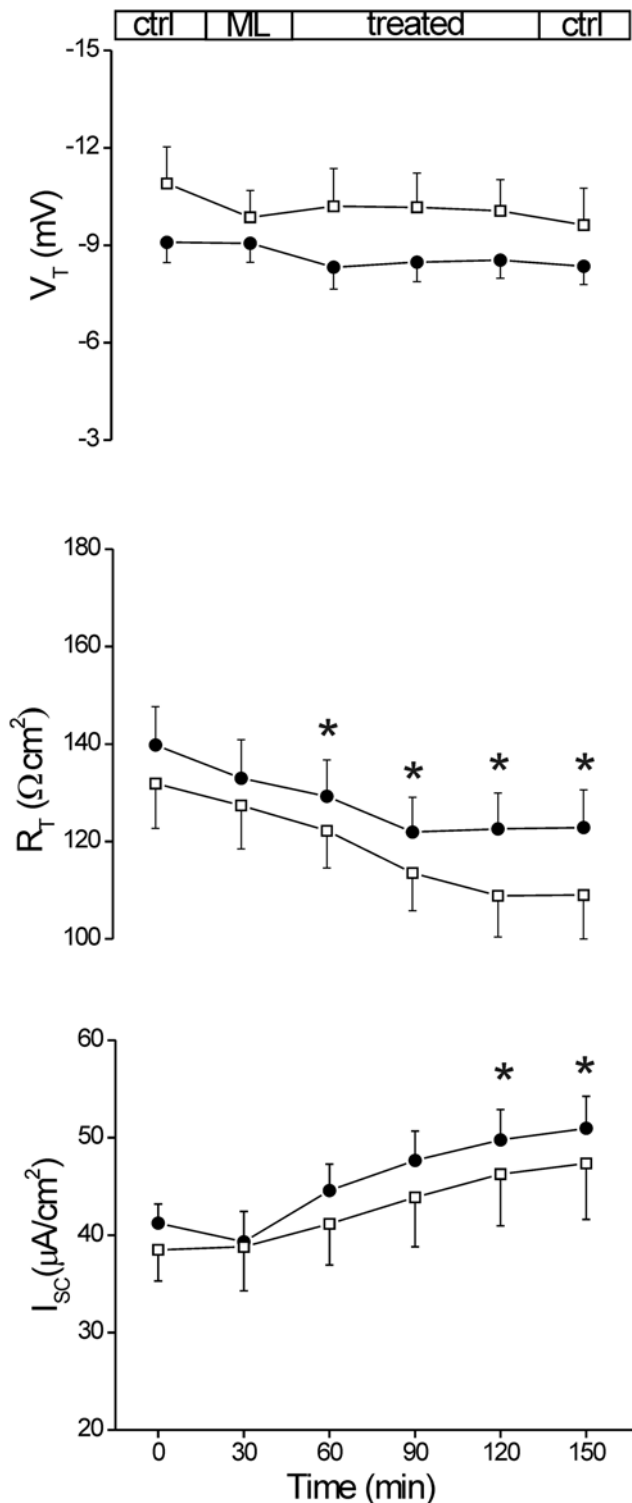

**Figure 3. Effect of mucosal exposure to VCC.** Human sigmoid colon specimens mounted in Ussing chamber were sequentially monitored for transepithelial potential difference ( $V_T$ , mV) and tissue resistance ( $R_T$ ,  $\Omega \text{ cm}^2$ ) changes under open-circuit condition, and for short circuit current ( $I_{sc}$ ,  $\mu\text{A/cm}^2$ ) with voltage clamped to zero. Electrical parameters were measured in the basal state (Ctrl) and during incubation (Treated) with VCC 1 nM (filled circles:  $n=10$ ;  $m=7$ ) or 0.5 nM (empty squares:  $n=5$ ;  $m=2$ ). All tissues were treated with mucolytic solution (ML) containing papain (5 U/100 ml) plus L-cysteine (5 mM) prior exposure to VCC. Each data point represents the average  $\pm$  S.E.M. of measurements in  $n$  specimen from  $m$  mucosae.

Significance was determined by Student's  $t$  test for paired data of treated vs control (time=0); \*,  $p<0.05$ .  
doi:10.1371/journal.pone.0005074.g003

surface of the colon specimen ( $\text{cm}^2$ ). Serosal ( $C_s$ ) and mucosal ( $C_m$ ) FITC concentrations were corrected respectively for dilution and flux.

### Statistical analyses

Data are expressed as means  $\pm$  S.E.M. Student's  $t$ -test was used for statistical analysis of differences between experimental groups. In experiments on human colon each data set represents independent measurements on separate specimen ( $n$ ) obtained from stripped mucosal preparation ( $m$ ), were one to three tissue specimen were obtained from the same colon. Student's  $t$ -test for paired data was performed between results obtained on separate specimen ( $n$ ) in treated vs untreated condition. A  $p$ -value equal or below 0.05 was defined as a significant difference. Calculations were performed with the NCSS2007 software (Hintze J. Kaysville, UT, USA, www.NCSS.com).

## Results

### VCC induces chloride efflux from Caco-2 cells

Diarrheagenic toxins affect  $\text{Cl}^-$  secretion in the intestine. Based on its channel properties, as discussed above, we first evaluated whether VCC was able to promote a chloride efflux in the Caco-2 intestinal cell line. Chloride movement was monitored using the chloride-sensitive fluorescent dye MEQ, whose increase in fluorescence indicates chloride efflux from the cytoplasm. Cells loaded with diH-MEQ were incubated with PBS (control) or with 500 pM VCC for 30 minutes before each experiment. After a basal record of fluorescence in  $\text{Cl}^-$ -containing HEPES buffer, cells were perfused with a chloride-free buffer to induce a chloride efflux from the cytoplasm and subsequently exposed to HEPES buffer to allow the chloride readmission. As shown in Fig. 2A this manoeuvre induced in the control cells an increase in fluorescence followed by a decrease, suggesting the presence of functional chloride channels on the plasma membrane. In cells treated with VCC the extent of increased fluorescence was significantly higher suggesting an increase in chloride permeability. This effect could be mediated by the activation of endogenous channels by the toxin or by the toxin itself. To discriminate between these two alternative possibilities the effect of the chloride channel inhibitor DIDS, an efficient blocker of the VCC-formed channels [18], was evaluated on control and VCC-treated cells. As shown in Fig. 2B, incubation with 100  $\mu\text{M}$  DIDS did not affect the fluorescence signal of control cells, demonstrating that the endogenous channels were not blocked by DIDS at the concentration used. In contrast, DIDS completely abrogated the enhanced fluorescence signal of toxin-treated cells. These data strongly suggest that VCC forms chloride channels in the plasma membrane of the cells.

### VCC determines short circuit current ( $I_{sc}$ ) increase and transepithelial resistance ( $R_T$ ) decrease in the whole intact intestinal epithelium

In subsequent experiments, we assessed whether VCC acts as  $\text{Cl}^-$  channel also in a human model of the natural anatomical site of the bacterial colonization. *V. cholerae* infection affects both small and large bowel [30], however, the possibility to obtain human jejunum rather than colon specimen is scanty, whilst large intestine specimens are more common. Accordingly, we used human healthy sigmoid colon mucosal sheets, obtained from 47 patients

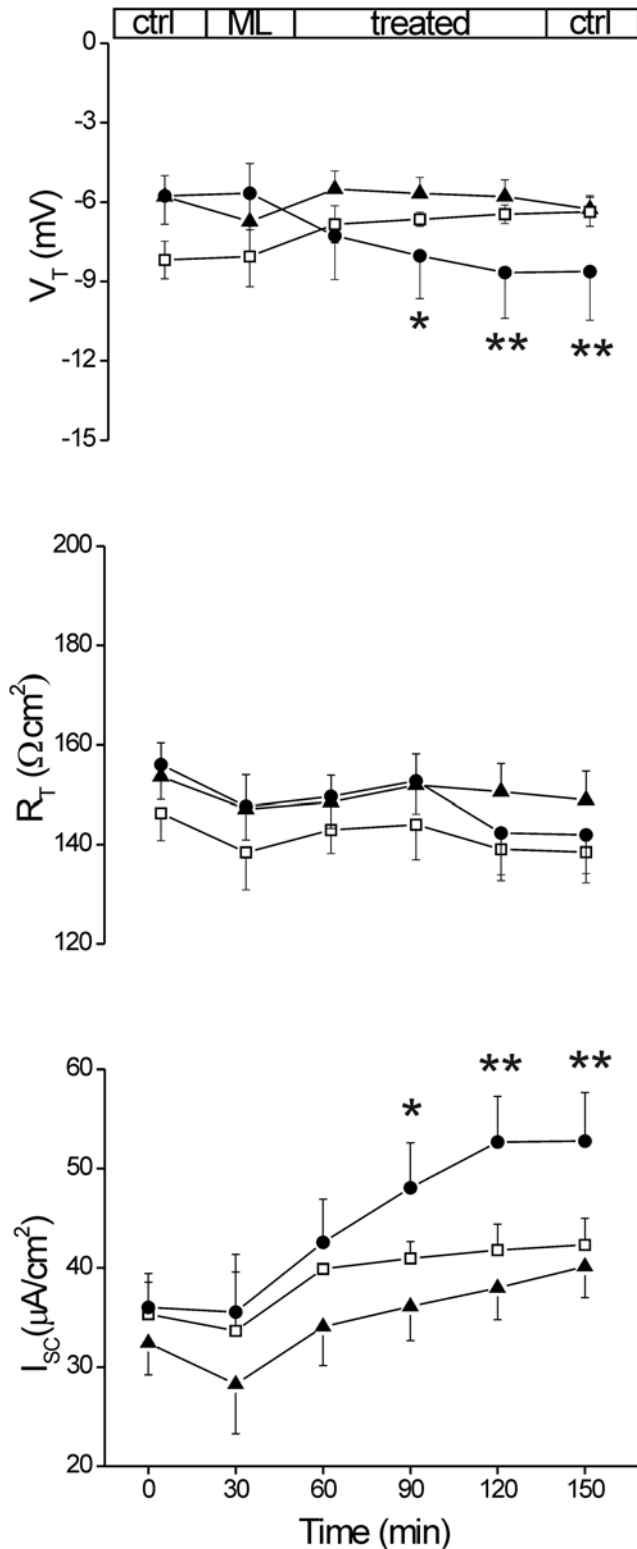

**Figure 4. Effect of mucosal exposure to *Staphylococcus aureus*  $\alpha$ -hemolysin.** Human sigmoid colon specimens in the basal state (Ctrl) and during mucosal incubation (Treated) with  $\alpha$ -hemolysin 60 nM (filled triangles: n=5; m=4), 90 nM (empty squares: n=3; m=3) and 120 nM (filled circles: n=6; m=6). Electrical parameters were measured as reported in legend of Fig. 3. Each data point represents the average  $\pm$  S.E.M. of measurements in n specimen from m mucosae. Significance was determined by Student's t test for paired data of treated vs control (time=0); \*, p<0.05; \*\*, p<0.02. doi:10.1371/journal.pone.0005074.g004

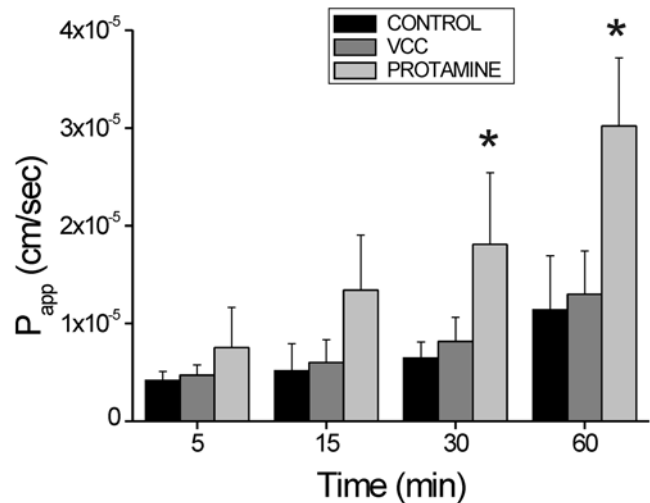

**Figure 5. Effect of VCC on paracellular permeability.** Paracellular permeability of human colon specimen (0.8 cm<sup>2</sup>) mounted in Ussing chamber to mucosal-to-serosal flux of fluorescein isothiocyanate (FITC 140  $\mu$ M) was measured in the presence or absence of mucosal VCC (1 nM) or protamine (100 mg/ml). Data are expressed as apparent permeability ( $P_{app}$ ) calculated as reported in the *Material and Methods*. Each data point represents the average of 4 independent experiments. T-test for paired data was performed vs control (PBS exposed mucosa): \* p<0.05. doi:10.1371/journal.pone.0005074.g005

(28 male and 19 female; ages between 32 and 84) undergoing subtotal colectomy for colon cancer. A total of 62 specimens (n) from 37 tissues (m), mounted in Ussing chambers at 37°C and bathed in oxygenated Krebs solution, exhibited a basal  $V_T$  value of  $-7.28 \pm$  (S.E.M.) 0.49 mV, lumen negative;  $R_T$  was  $149.24 \pm 5.22 \Omega \text{ cm}^2$  and  $I_{SC}$  was  $37.16 \pm 1.57 \mu\text{A/cm}^2$ . Topical exposure to VCC (0.2, 0.5, 1 nM) did not elicit significant changes within 90 min (n=8; m=6), data not shown. The inefficacy of VCC in these experiments could be related to the presence of the protective mucus layer coating the gut lumen [31,32], which is however penetrated by vibrios. Therefore, in order to improve VCC interaction with the apical membranes of colon enterocytes, the luminal mucus layer was removed by enzymatic exposure (as explained in the *Material and Methods* section).

Following removal of the enzyme cocktail, exposure to 1 nM VCC (n=10; m=7) within 90 min increased significantly  $I_{SC}$  by 20.7% (p<0.05 vs control) and reduced  $R_T$  by 12.3% (p<0.05) while  $V_T$  decreased by about 7% but not significantly, as reported in Fig. 3. Following the same protocol, the exposure to 0.5 nM VCC (n=5; m=2) elicited similar responses but with smaller significance (Fig. 3).  $R_T$  reduction and  $I_{SC}$  increase reflect alteration of the epithelial permeability and enhancement of the ion flux which might be related to VCC-dependent channel formation. In order to test the sensitivity of the human colon epithelial model to pore-forming bacterial toxins, a series of comparative experiments was performed using  $\alpha$ -Hemolysin of *Staphylococcus aureus* [33,34]. Following similar protocol for mucus layer removal by enzymatic treatment, exposure to 120 nM  $\alpha$ -Hemolysin within 90 min increased significantly  $I_{SC}$  by 46.3% (p<0.02 vs control), while  $V_T$  became more negative by 49.9% (p<0.02 vs control) and  $R_T$  was reduced by 8.7%, albeit not significantly (Fig. 4). Similar, although minor, responses were observed with 60 and 90 nM  $\alpha$ -Hemolysin. Alteration of the epithelial parameters points to a correlation with toxin-dependent channel formation.

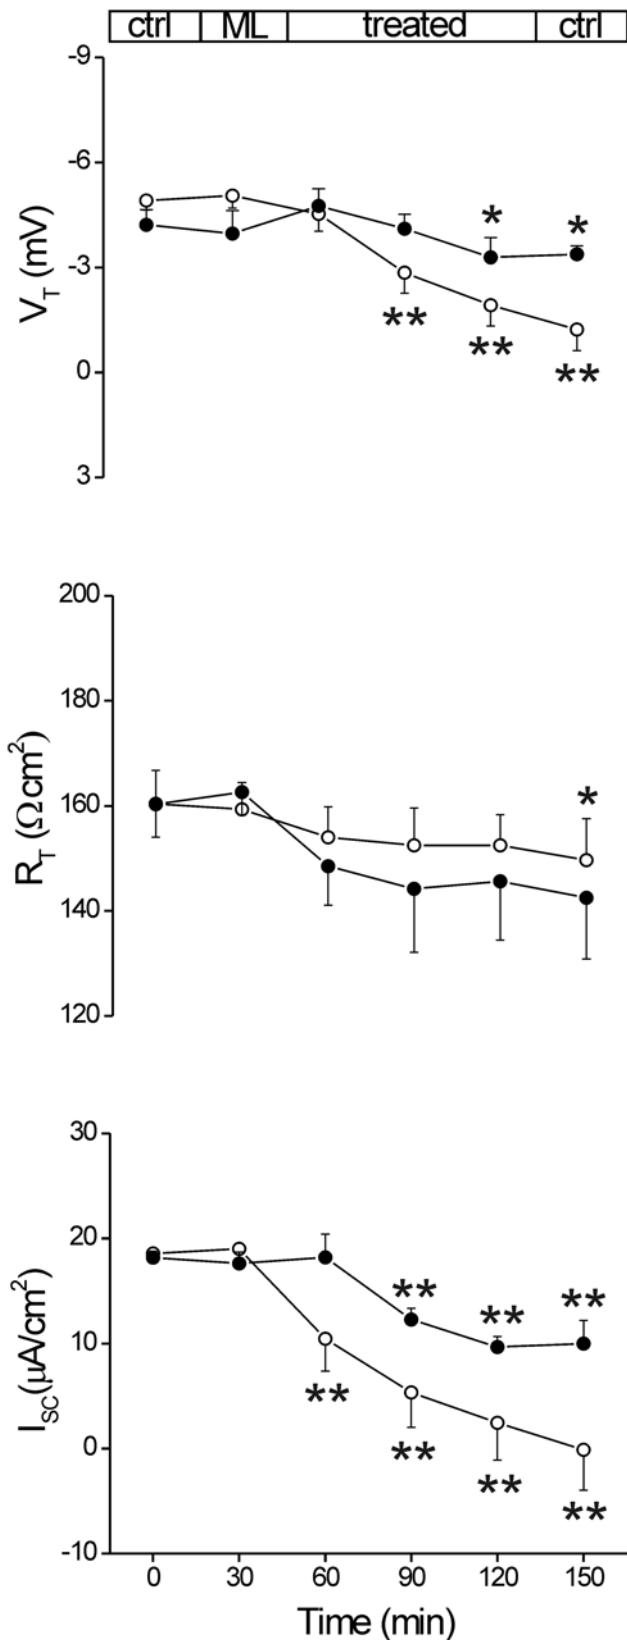

**Figure 6. Effect of VCC during bilateral incubation in low-Cl<sup>-</sup> solution.** The colon specimens mounted in Ussing chamber were incubated in low-Cl<sup>-</sup> (9 mM) solution, from the beginning to the end of the experiment, in the presence or in the absence of mucosal VCC 1 nM. Electrical parameters were measured as reported in legend of

Fig. 2. Filled circles refer to toxin-exposed tissues (n=3; m=3), while empty circles refer to non-treated tissues (n=4; m=3). Significance was determined by Student's t test for paired data of control (time=0) and treated; \*, p<0.05;\*\*, p<0.02.  
doi:10.1371/journal.pone.0005074.g006

### VCC did not affect paracellular permeability

It is widely accepted that trans-epithelial resistance is an accurate marker of epithelial viability and correlates with selective mucosal permeability [35,36]. In order to investigate whether a paracellular ion flux could contribute to the VCC-induced R<sub>T</sub> reduction, the permeability of colon mucosa was assessed by mucosal-to-serosal FITC flux [29]. Fig. 5 shows that FITC apparent permeability after mucosal exposure to VCC (1 nM) for 60 min was  $1.3 \times 10^{-5} \pm 4.4 \times 10^{-6}$  cm/sec (n=4), a value not significantly different from  $1.1 \times 10^{-5} \pm 5.5 \times 10^{-6}$  cm/sec (n=4), observed in the presence of VCC vehicle (PBS). Dissimilarly, mucosal exposure to the polyamine protamine increased significantly epithelial permeability up to  $3.2 \times 10^{-5} \pm 6.9 \times 10^{-6}$  cm/sec (n=4; p<0.05 vs control), as observed in other substrates [37].

### VCC-induced effects on intestinal epithelium depend on chloride channels

Correlation between the observed effects and putative VCC chloride channels was tested by lowering Cl<sup>-</sup> in the mucosal and serosal solution from 116 mM to 9 mM (NaCl replaced with Na-Isethionate). If chloride channels are functional in the cell plasma membrane this manoeuvre should lead to diminution of the VCC effect on I<sub>SC</sub> but not on R<sub>T</sub> since Cl<sup>-</sup> reduction would affect the ion transport but not channel formation. Fig. 6 shows that in 4 specimen from 3 tissues bilateral incubation with low-Cl<sup>-</sup> reduced V<sub>T</sub> by 60.9% (p<0.02) and I<sub>SC</sub> by 86.8% (p<0.02) up to current polarity inversion. R<sub>T</sub> was reduced only by 4.9%. These changes could be interpreted as a consequence of the reduced Cl<sup>-</sup> secretion from the crypts [30]. Exposure to 1 nM VCC during bilateral chloride diminution (n=3; m=3), reduced I<sub>SC</sub> and V<sub>T</sub> by 46.8% (p<0.02) and 22.0% (p<0.05) respectively, while R<sub>T</sub> was reduced by 9.1%. The variations reflect the increase of the epithelial permeability related to chloride channel formation and its influence on ion transport in both the crypt and surface epithelial cells.

### VCC-induced effects are independent on Na<sup>+</sup> transport

Since VCC-induced current increase could depend either on the Cl<sup>-</sup> secretion or on the electrogenic Na<sup>+</sup> absorption, the potential relationship between the VCC-induced current increase and Na<sup>+</sup> transport was tested using the Na<sup>+</sup> channel blocker amiloride [38,39]. Fig. 7 shows that in 4 specimen from 3 tissues amiloride (0.1 mM) significantly reduced the I<sub>SC</sub> and the V<sub>T</sub> by 41.1% (p<0.02) and 16.5% (p<0.05) respectively, while R<sub>T</sub> increased by 9.8% (p<0.02). Subsequent exposure to 1 nM VCC in 1 hour increased I<sub>SC</sub> and V<sub>T</sub> toward control levels up to 28% and 14% respectively, while R<sub>T</sub> was reduced by 7.5%. Replacing the mucosal bath with Krebs solution removed the effects of amiloride restoring the I<sub>SC</sub> almost to the control value, while dropped the R<sub>T</sub> to about 9.3% below control value. The latter effect was probably due to the formation of VCC-induced channels.

### VCC contributes to the endogenous chloride movement through the intestinal epithelium

In order to better analyze the Cl<sup>-</sup> ion movement that occurred through the VCC-formed pores we used the chloride channel inhibitor DIDS, on both control tissue and toxin-treated colon, at a concentration able to block chloride transport in apical

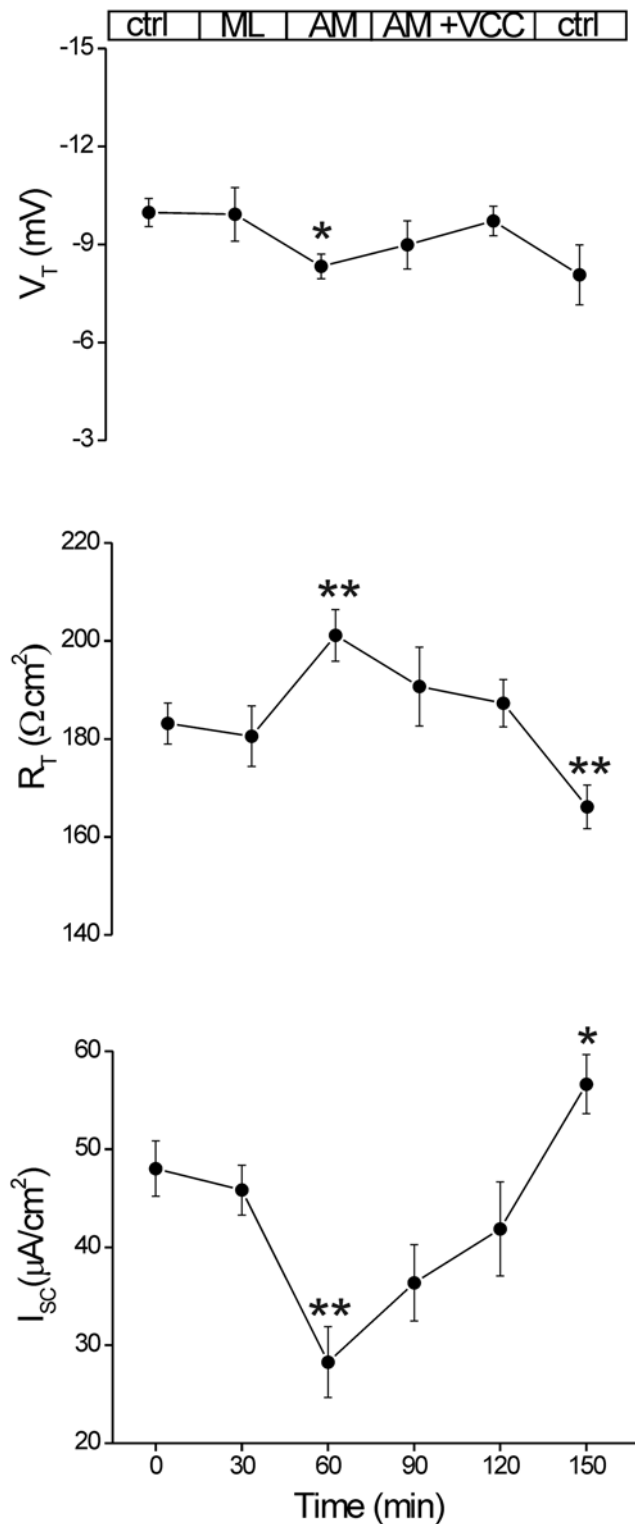

**Figure 7. Effect of amiloride on VCC-induced I<sub>sc</sub>.** Effect of VCC (1 nM) on Na<sup>+</sup> conductance was tested on amiloride (0.1 mM) pretreated human sigmoid colon (n=4; m=3). Electrical parameters were measured in the basal state (Ctrl), followed by incubation with mucosal amiloride (30 min), successive addition of VCC (60 min) and after removing the agonists (Ctrl). Significance was determined by Student's *t* test for paired data of control (time=0) and treated; \*, p<0.05; \*\*, p<0.02. doi:10.1371/journal.pone.0005074.g007

membrane vesicles from human distal colon [40], and in the whole rat colon [41]. As reported in Fig. 8, DIDS (1 mM), after 90 min of incubation, increased significantly R<sub>T</sub> by 14.4% (p<0.02; n=7; m=5). I<sub>SC</sub> and V<sub>T</sub> were both altered transiently in the first 30 min: I<sub>SC</sub> decreased with a maximal reduction of 22.9%, while V<sub>T</sub> increased by 5.9%, albeit both changes were not significant. R<sub>T</sub> increase is suitable with apical endogenous anionic channel blockage, while transient V<sub>T</sub> increase and I<sub>SC</sub> decrease could probably be related to the progressive reduction of both the basolateral Na<sup>+</sup>-K<sup>+</sup>-2Cl<sup>-</sup> cotransport activity and the K<sup>+</sup> recirculation through the basolateral K<sup>+</sup> channels following blockage of apical Cl<sup>-</sup> exit [30,41,42]. Exposure to 1 nM VCC at the same time of DIDS transiently increased V<sub>T</sub> within 30 min by 33.1% (p<0.02) and I<sub>SC</sub> by 8.2% (n=7; m=4). The increase could be probably interpreted as progressive appearance and blockage of VCC-formed channels. The VCC-induced R<sub>T</sub> drop was partially inhibited by DIDS. An analysis comparing the three sets of experiments (exposure to VCC, DIDS and VCC+DIDS) and converting the epithelial resistance into conductance indicates that DIDS inhibits by about 70% the toxin anion channels. Taken together, these findings suggest that VCC-formed channels can support additional apical chloride efflux from human colon tissue samples.

## Discussion

The mechanism involved in the pathogenesis of human enteritis consequent to infections sustained by non-toxicogenic *Vibrio cholerae* strains remains still unclear [9,43,44] and no single virulence factor has yet been identified to explain their enterotoxicity [45]. VCC, the hemolysin produced by virtually all *Vibrio cholerae* strains, has been proposed as a possible candidate: Hichinose and colleagues, first reported the enterotoxicity of El Tor-like hemolysin from non-O1 *V. cholerae* in 1987 [20], a finding that was later confirmed [6,46]. However, although collectively these data suggest a crucial role for VCC as an enterotoxic virulence factor, a clear-cut demonstration is still lacking.

Considering that one of the mechanisms of toxin-induced diarrhoea depends on direct effects on ion transport in intestinal epithelial cells [22], we examined the effects of purified VCC on human healthy sigmoid colon mucosal sheets. The sensitivity of the human colon epithelial model to pore-forming bacterial toxins was also assessed by comparative experiments using α-Hemolysin of *Staphylococcus aureus*.

The exposure to the VCC significantly reduced R<sub>T</sub> up to 12.3% and increased I<sub>SC</sub> up to 20.7% within 90 min.

The R<sub>T</sub> decrease could be the result of change either in the epithelial cell membrane conductance or in the paracellular pathway. Evaluation of the mucosal-to-serosal flux of fluorescein isothiocyanate demonstrated that paracellular pathway is not affected by the VCC, thus the R<sub>T</sub> decrease could be related to modification of the transcellular resistance and represents the major evidence that VCC forms pores. The analysis of time course for R<sub>T</sub> and I<sub>SC</sub> changes upon VCC exposure suggests that, for the concentrations used in our experiments, the channel formation is a gradual process that reaches its maximum within one hour.

In the absence of VCC, and with a null mucosal *vs* serosal ionic gradient, the polarization of the whole epithelium depends either on the Cl<sup>-</sup> secretion or on the electrogenic Na<sup>+</sup> absorption. In the distal colon the Cl<sup>-</sup> secretion occurs mainly through the cystic fibrosis transmembrane conductance regulator channels (CFTR), which is expressed throughout the entire colonic epithelium but dominates in the lower part of the crypts [30]. The Na<sup>+</sup> transport relies mainly on amiloride-sensitive Na<sup>+</sup> channels (ENaC)

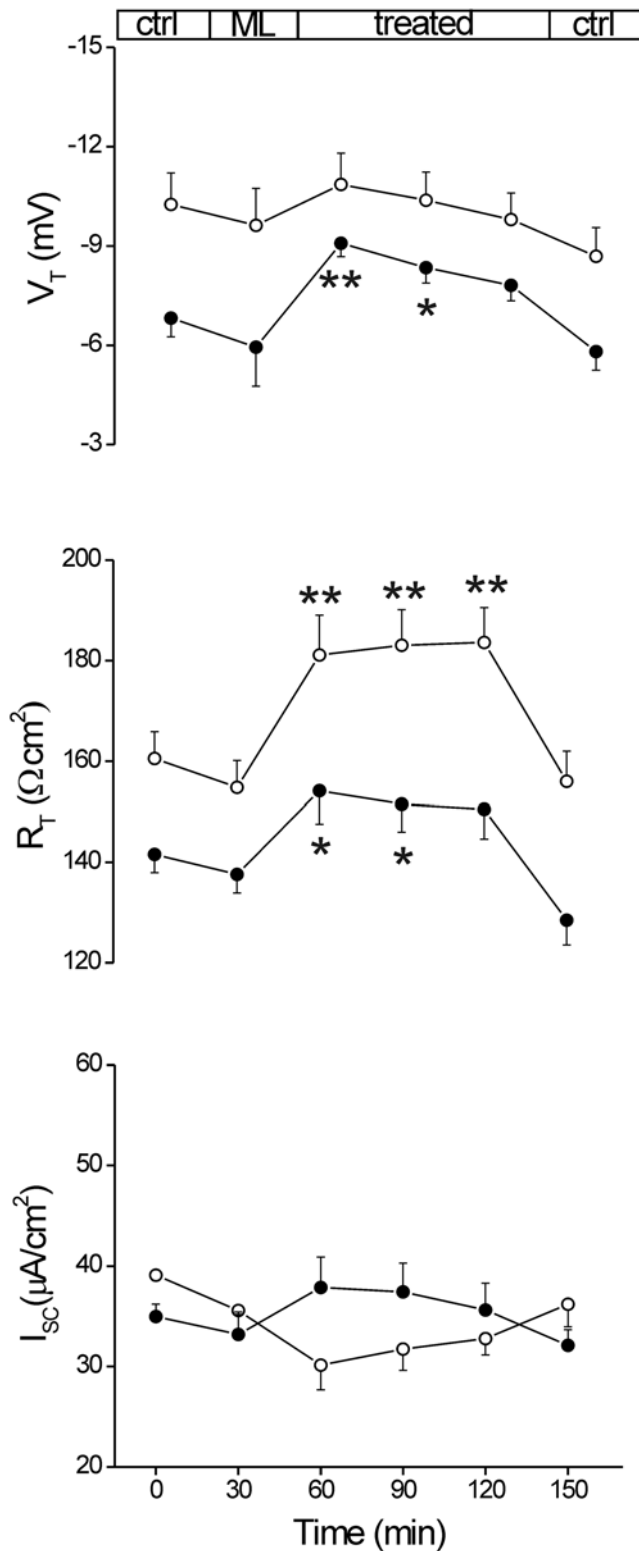

**Figure 8. Effect of DIDS on VCC-induced I<sub>sc</sub>.** Effect of VCC on human sigmoid colon Cl<sup>-</sup> conductance was tested by mucosal exposure to DIDS (1 mM) in the presence (n=7; m=4) or in the absence (n=7; m=5) of VCC 1 nM. Filled circles refer to toxin-exposed tissues while empty circles refer to non-treated tissues. Electrical parameters were measured in the basal state (Ctrl), during incubation with DIDS or DIDS plus VCC added to the mucosal side (Treated) and after removing the agonists (Ctrl). Significance was determined by Student's *t* test for paired data of control (time=0) and treated; \*, p<0.05; \*\*, p<0.02. doi:10.1371/journal.pone.0005074.g008

expressed in the surface epithelium and upper crypts [30]. On the basis of these considerations, the I<sub>SC</sub> increase consequent to the VCC exposure could be compatible with the enhancement of either the Cl<sup>-</sup> secretion or the Na<sup>+</sup> absorption.

If, by hypothesis, VCC forms cation channels, as suggested in a previous report [24], we would expect a rise of the I<sub>SC</sub> associated to an increased electrogenic Na<sup>+</sup> flux. Our experiments with amiloride, a typical inhibitor of the Na<sup>+</sup> conductance [39], showed that the VCC-dependent I<sub>SC</sub> increase, as well as the R<sub>T</sub> decrease, are not affected by the loop diuretic, excluding the Na<sup>+</sup> flux involvement in the VCC-induced effects.

In order to confirm that the I<sub>SC</sub> increase, observed upon VCC exposure, was due to the Cl<sup>-</sup> ion passage through VCC-formed channels, we evaluated the effects of the toxin after reducing Cl<sup>-</sup> concentration in the incubation milieu. Mucosal VCC addition elicited a large drop of the R<sub>T</sub> compatible with channel formation in the apical membrane and responsible for a conductance increment which is virtually independent from the ion concentration. In contrast, the I<sub>SC</sub>, which remained almost constant during the first 30 minutes, probably because of progressive VCC-channel formation, subsequently started to decrease reaching 50% of the initial value. This demonstrated that the I<sub>SC</sub> increment induced by the toxin (Fig. 3) is principally related to the Cl<sup>-</sup> movement. Treatment with the chloride channel inhibitor DIDS also confirmed that the ion movement occurs through VCC-formed pores.

Altogether these results represent the first *in vivo* evidence that VCC could be a diarrhogenic factor. Indeed, abnormal secretion of Cl<sup>-</sup> across the intestinal apical membrane would increase the outward movement of Na<sup>+</sup> and water, leading to the accumulation of fluid in the gastro-intestinal tract.

## Acknowledgments

The authors thank Prof. G. Teti (Department of Pathology and Experimental Microbiology, University of Messina) for valuable advice, Prof. G. Palasciano (Clinica Medica "A. Murri", University of Bari) for instrumentation availability, Dr. B. Cetera, Dr. G. Busco and Dr. A. Garbetta for joining some measurements. The authors also thank Prof. F. Prete, Dr. L. Scoppetta (Surgical Unit) and Dr. V.L. Troilo (Department of Emergency and Organ Transplantation) - Policlinico of Bari, for kindly supplying the human colon tissues.

## Author Contributions

Conceived and designed the experiments: LD AD DA CS MDB. Performed the experiments: LD AD DA RF. Analyzed the data: LD CS MDB. Contributed reagents/materials/analysis tools: LD PP DFA MDB. Wrote the paper: LD MDB.

## References

- World Health Organization (2001) Cholera vaccines. *Wkly Epidemiol Rec* 76: 117–124.
- Faruque SM, Albert MJ, Mekalanos JJ (1998) Epidemiology, genetics, and ecology of toxigenic *Vibrio cholerae*. *Microbiol Mol Biol Rev* 62: 1301–1314.
- Karaolis DK, Johnson JA, Bailey CC, Boedeker EC, Kaper JB, et al. (1998) A *Vibrio cholerae* pathogenicity island associated with epidemic and pandemic strains. *Proc Natl Acad Sci U S A* 95: 3134–3139.
- Sanyal SC, Huq MI, Neogy PK, Alam K, Kabir MI, et al. (1984) Experimental studies on the pathogenicity of *Vibrio mimicus* strains isolated in Bangladesh. *Aust J Exp Biol Med Sci* 62: 515–521.
- Saha DR, Pal A, Rajendran K, Dutta P (2006) Histopathological changes in experimental cholera with a non toxigenic non-O1 non-O139 *Vibrio cholerae* strain isolated from Kolkata, India. *Indian J Exp Biol* 44: 221–227.
- Saka HA, Bidinost C, Sola C, Carranza P, Collino C, et al. (2008) *Vibrio cholerae* cytotoxin is essential for high enterotoxicity and apoptosis induction produced by a cholera toxin gene-negative *V. cholerae* non-O1, non-O139 strain. *Microb Pathog* 44: 118–128.
- Coelho A, Andrade JR, Vicente AC, Salles CA (1995) New variant of *Vibrio cholerae* O1 from clinical isolates in Amazonia. *J Clin Microbiol* 33: 114–118.



8. Saha PK, Koley H, Mukhopadhyay AK, Bhattacharya SK, Nair GB, et al. (1996) Nontoxicogenic *Vibrio cholerae* O1 serotype Inaba biotype El Tor associated with a cluster of cases of cholera in southern India. *J Clin Microbiol* 34: 1114–1147.
9. Ninin E, Caroff N, El Kouri D, Espaze E, Richet H, et al. (2000) Nontoxicogenic *Vibrio cholerae* O1 bacteremia: case report and review. *Eur J Clin Microbiol Infect Dis* 19: 489–491.
10. Alm RA, Stroecher UH, Manning PA (1988) Extracellular proteins of *Vibrio cholerae*: nucleotide sequence of the structural gene (hlyA) for the haemolysin of the haemolytic El Tor strain O17 and characterization of the hlyA mutation in the non-haemolytic classical strain 569B. *Mol Microbiol* 2: 481–488.
11. Yamamoto K, Ichinose Y, Shinagawa H, Makino K, Nakata A, et al. (1990) Two-step processing for activation of the cytolysin/hemolysin of *Vibrio cholerae* O1 biotype El Tor: nucleotide sequence of the structural gene (hlyA) and characterization of the processed products. *Infect Immun* 58: 4106–4116.
12. Nagamune K, Yamamoto K, Honda T (1997) Intramolecular chaperone activity of the pro-region of *Vibrio cholerae* El Tor cytolysin. *J Biol Chem* 272: 1338–1343.
13. Zitzer A, Zitzer O, Bhakdi S, Palmer M (1999) Oligomerization of *Vibrio cholerae* cytolysin yields a pentameric pore and has a dual specificity for cholesterol and sphingolipids in the target membrane. *J Biol Chem* 274: 1375–1380.
14. Krasilnikov OV, Merzlyak PG, Lima VL, Zitzer AO, Valeva A, et al. (2007) Pore formation by *Vibrio cholerae* cytolysin requires cholesterol in both monolayers of the target membrane. *Biochimie* 89: 271–277.
15. Pantano S, Montecucco C (2006) A molecular model of the *Vibrio cholerae* cytolysin transmembrane pore. *Toxicon* 47: 35–40.
16. Coelho A, Andrade JR, Vicentem AC, Dirita VJ (2000) Cytotoxic cell vacuolating activity from *Vibrio cholerae* hemolysin. *Infect Immun* 68: 1700–1705.
17. Figueroa-Arredondo P, Heuser JE, Akopyants NS, Morisaki JH, Giono-Cerezo S, et al. (2001) Cell vacuolation caused by *Vibrio cholerae* hemolysin. *Infect Immun* 69: 1613–1624.
18. Moschioni M, Tombola F, de Bernard M, Coelho A, Zitzer A, et al. (2002) The *Vibrio cholerae* haemolysin anion channel is required for cell vacuolation and death. *Cell Microbiol* 4: 397–409.
19. Saka HA, Gutiérrez MG, Bocco JL, Colombo MI (2007) The autophagic pathway: a cell survival strategy against the bacterial pore-forming toxin *Vibrio cholerae* cytolysin. *Autophagy* 3: 363–365.
20. Hichinose Y, Yamamoto K, Nakasone N, Tanabe MJ, Takeda T, et al. (1987) Enterotoxicity of El Tor-like hemolysin of non-O1 *Vibrio cholerae*. *Infect Immun* 55: 1090–1093.
21. Singh DV, Matte MH, Matte GR, Jiang S, Sabeena F, et al. (2001) Molecular analysis of *Vibrio cholerae* O1, O139, non-O1, and non-O139 strains: clonal relationships between clinical and environmental isolates. *Appl Environ Microbiol* 67: 910–921.
22. Laohachai KN, Bahadi R, Hardo MB, Hardo PG, Kouric JI (2003) The role of bacterial toxins in the induction of changes in membrane transport: implications for diarrhoea. *Toxicon* 42: 687–707.
23. Hall RH, Drasar BS (1990) *Vibrio cholerae* HlyA hemolysin is processed by proteolysis. *Infect Immun* 58: 3375–3379.
24. Zitzer A, Palmer M, Weller U, Wassenaar T, Biermann C, et al. (1997) Mode of primary binding to target membranes and pore formation induced by *Vibrio cholerae* cytolysin (hemolysin). *Eur J Biochem* 247: 209–216.
25. Spirl C, Nathanson MH, Fiorotto R, Duner E, Denson LA, et al. (2001) Proinflammatory cytokines inhibit secretion in rat bile duct epithelium. *Gastroenterology* 121: 156–169.
26. Biwersi J, Verkman AS (1991) Cell-permeable fluorescent indicator for cytosolic chloride. *Biochemistry* 30: 7879–7883.
27. Flemström G, Hällgren A, Nylander O, Engstrand L, Wilander E, et al. (1999) Adherent surface mucus gel restricts diffusion of macromolecules in rat duodenum *in vivo*. *Am J Physiol* 277: G375–G382.
28. Debellis L, Papini E, Caroppo R, Montecucco C, Curci S (2001) *Helicobacter pylori* cytotoxin VacA increases alkaline secretion in gastric epithelial cells. *Am J Physiol Gastrointest Liver Physiol* 281: G1440–G1448.
29. Mayol JM, Adame-Navarrete Y, Alarma-Estrany P, Molina-Roldan E, Huete-Toral F, et al. (2006) Luminal oxidants selectively modulate electrogenic ion transport in rat colon. *World J Gastroenterol* 12: 5523–5527.
30. Kunzelmann K, Mall M (2002) Electrolyte transport in the mammalian colon: mechanisms and implications for disease. *Physiol Rev* 82: 245–289.
31. Atuma C, Strugala V, Allen A, Holm L (2001) The adherent gastrointestinal mucus gel layer: thickness and physical state *in vivo*. *Am J Physiol Gastrointest Liver Physiol* 280: G922–G929.
32. Strugala V, Allen A, Dettmar PW, Pearson JP (2003) Colonic mucin: methods of measuring mucus thickness. *Proc Nutr Soc* 62: 237–243.
33. Bhakdi S, Bayley H, Valeva A, Walev I, Walker B, Kehoe M, Palmer M (1996) Staphylococcal alpha-toxin, streptolysin-O, and *Escherichia coli* hemolysin: prototypes of pore-forming bacterial cytolysins. *Arch Microbiol* 165: 73–79.
34. Eichstaedt S, Gäbler K, Below S, Müller C, Kohler C, Engelmann S, Hildebrandt P, Völker U, Hecker M, Hildebrandt JP (2009) Effects of *Staphylococcus aureus*-hemolysin A on calcium signalling in immortalized human airway epithelial cells. *Cell Calcium* 45: 165–176.
35. Prasad M, Ito S, Silen W (1997) Functional studies of *in vitro* rat distal colon before and after restitution. *Surgery* 121: 430–439.
36. Gitter AH, Bendfeldt K, Schulzke JD, Fromm M (2000) Trans/paracellular, surface/crypt, and epithelial/subepithelial resistances of mammalian colonic epithelia. *Plügers Arch* 439: 477–482.
37. Peixoto EB, Collares-Buzato CB (2005) Protamine-induced epithelial barrier disruption involves rearrangement of cytoskeleton and decreased tight junction-associated protein expression in cultured MDCK strains. *Cell Struct Funct* 29: 165–178.
38. Sandle GI, Wills NK, Alles W, Binder HJ (1986) Electrophysiology of the human colon: evidence of segmental heterogeneity. *Gut* 27: 999–1005.
39. Mall M, Bleich M, Leich M, Kuehr J, Brandis M, et al. (1999) CFTR-mediated inhibition of amiloride sensitive sodium conductance by CFTR in human colon is defective in cystic fibrosis. *Am J Physiol Gastrointest Liver Physiol* 277: G709–G716.
40. Alrefai WA, Ramaswamy K, Dudeja PK (2001) Mechanism(s) of chloride transport in human distal colonic apical membrane vesicles. *Dig Dis Sci* 46: 2209–2218.
41. Moschetta A, Portincasa P, Debellis L, Petruzzelli M, Montelli R, et al. (2003) Basolateral Ca<sup>2+</sup>-dependent K<sup>+</sup>-channels play a key role in Cl<sup>-</sup> secretion induced by taurodeoxycholate from colon mucosa. *Biol Cell* 95: 115–122.
42. Greger R, Bleich M, Leipziger J, Ecke D, Mall M, et al. (1997) Regulation of ion transport in colonic crypts. *News Physiol Sci* 12: 62–66.
43. Blake PA, Weaver RE, Hollis DG (1980) Diseases of humans (other than cholera) caused by vibrios. *Annu Rev Microbiol* 34: 341–367.
44. Finch MJ, Valdespinom JL, Wells JG, Perez-Perez G, Arjona F, et al. (1987) Non-O1 *Vibrio cholerae* infections in Cancun, Mexico. *Am J Trop Med Hyg* 36: 393–397.
45. Faruque SM, Chowdhury N, Kamruzzaman M, Dziejman M, Rahman MH, et al. (2004) Genetic diversity and virulence potential of environmental *Vibrio cholerae* population in a cholera-endemic area. *Proc Natl Acad Sci U S A* 101: 2123–2128.
46. Zitzer AO, Nakisbekov NO, Li AV, Semiotrokov VL, Kiseliov Y, et al. (1993) Enterotoxin-cytolysin (EC) from *Vibrio cholerae* non-O1 (some properties and pore-forming activity). *Zentralbl Bakteriologie* 279: 494–504.
